# Supplementary material for: Distinct photochemistry in glycine particles mixed with different atmospheric nitrate salts
Source: Copernicus journal article supplement (doi:10.5194/acp-23-9585-2023), 2023-08-29
Supplement: Supplementary file 1 [file acp-23-9585-2023-supplement.pdf]

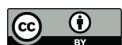

*Supplement of*

## **Distinct photochemistry in glycine particles mixed with different atmospheric nitrate salts**

**Zhancong Liang et al.**

*Correspondence to:* Chak K. Chan (chak.k.chan@cityu.edu.hk, chak.chan@kaust.edu.sa)

The copyright of individual parts of the supplement might differ from the article licence.

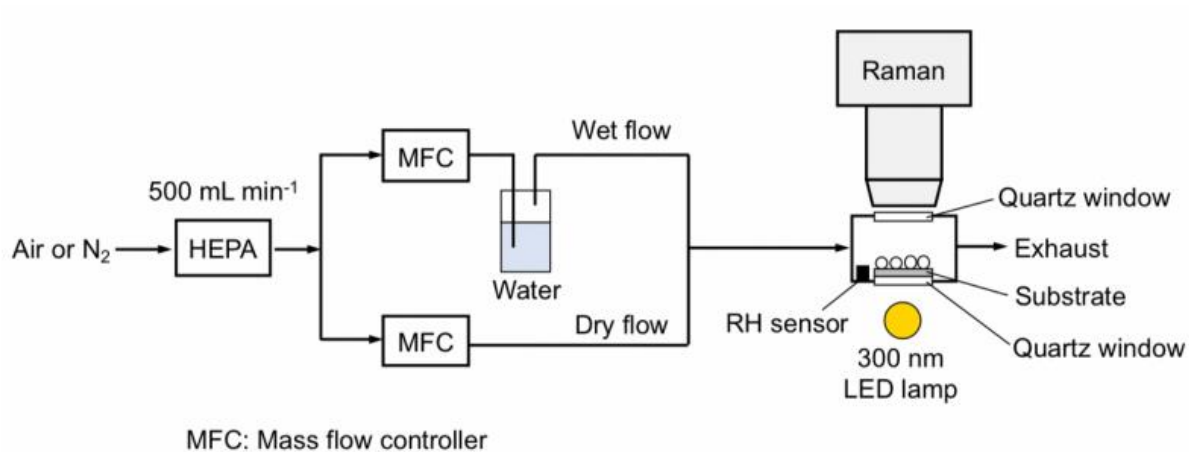

**Figure S1.** The schematic of the aerosol flow-cell system.

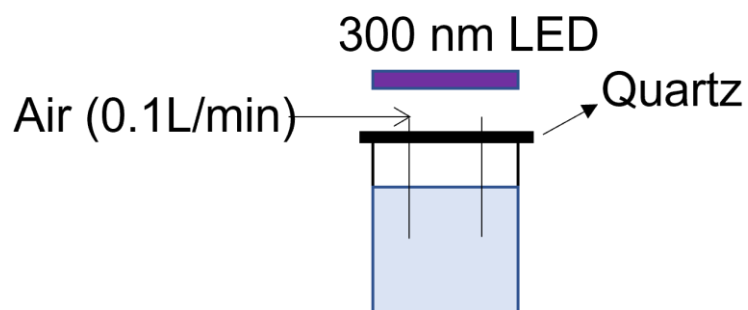

**Figure S2.** The schematic of the aqueous reactor system.

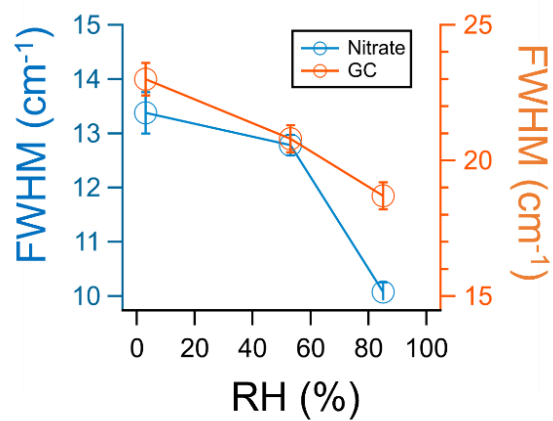

**Figure S3.** The Full width at half maxima of nitrate peak (at  $\sim 1050 \text{ cm}^{-1}$ ) and glycine peak ( $\sim 900 \text{ cm}^{-1}$ ) in AN+GC particles at different RHs.

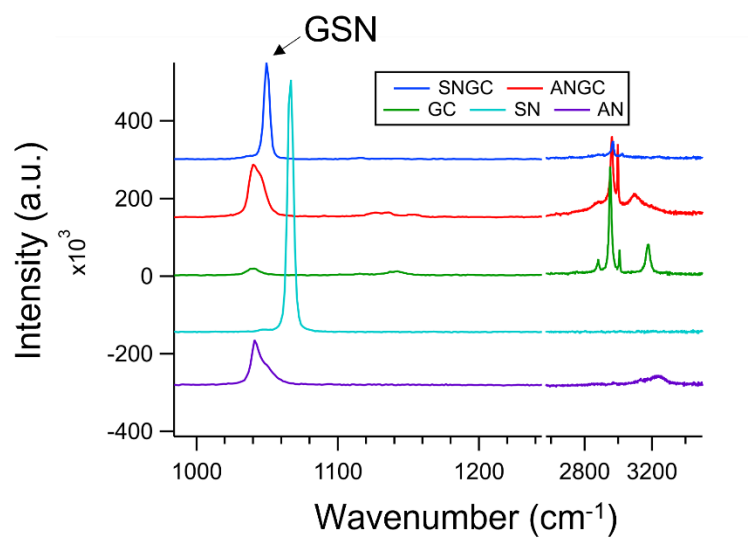

**Figure S4.** The Raman characteristic peak of GSN.

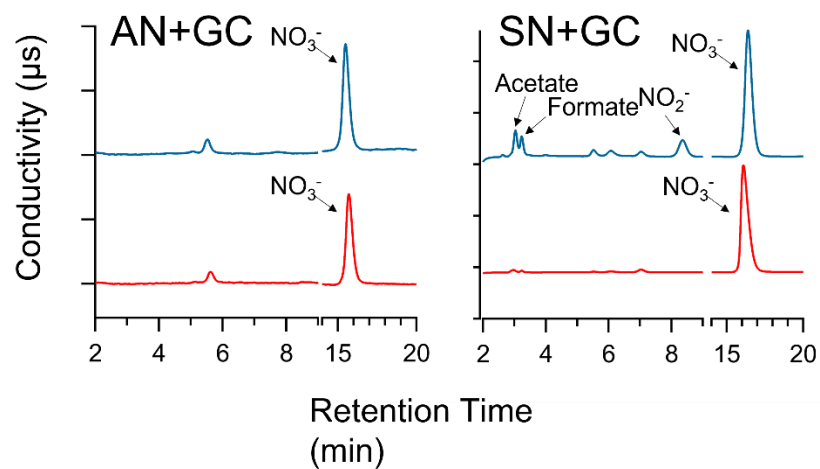

**Figure S5.** Ionic chromatography of Fresh and UV-aged (8 h) AN+GC and SN+GC particles extract. The particles were aged at 80%RH.

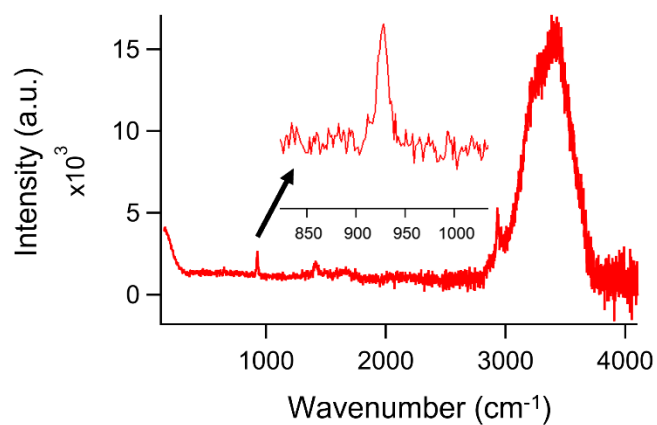

**Figure S6.** Raman spectrum of ammonium acetate solution.

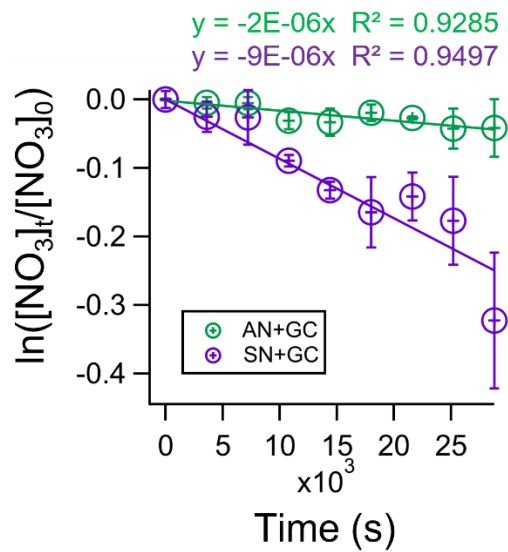

**Figure S7.** The decay kinetics of nitrate in AN+GC and SN+GC particles at 80% RH.

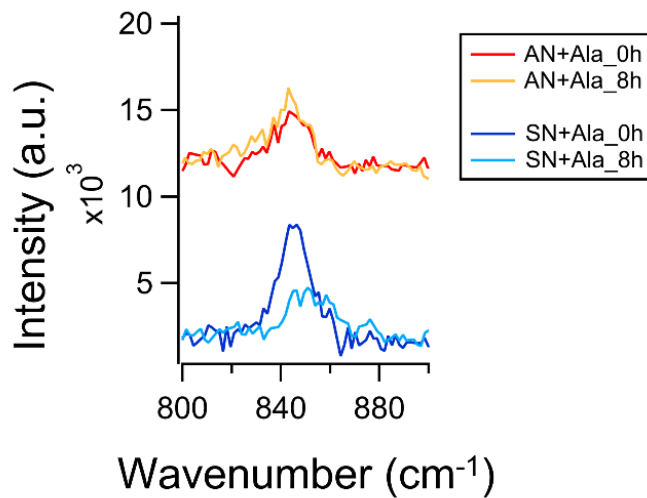

**Figure S8.** Raman spectrum of AN+Ala and SN+Ala mixed particles after 0 and 8 h irradiation at 80%RH.
